# Supplementary material for: Additive Interaction Between the Renin-Angiotensin System and Lipid Metabolism for Cancer in Type 2 Diabetes
Source: Oxford University Press journal article supplement (doi:10.2337/db09-0105), 2009-04-28
Supplement: db090105-sup-appendix_table.doc [file db090105-sup-appendix_table.doc]

Appendix Table. Hazard ratios of use of oral anti-diabetic drugs for site-specific cancers

| Cancer subtypes | Number  of cancer† |  | Hazard ratio (95% confidence interval) of drug use‡ | | |
| --- | --- | --- | --- | --- | --- |
|  | RAS inhibitors=yes & statins=no | Statins=yes & RAS inhibitors=no | Statins=yes & RAS inhibitors=yes |
| 1). Lip, oral cavity, and pharynx | 7 |  | - | - | - |
| 2). Respiratory and intrathoracic organs | 26 |  | - | - | - |
| 3). Genitourinary organs | 29 |  | **-** | - | - |
| 4). Lymphatic and hematopoietic tissue | 9 |  | - | **-** | **-** |
| 5). Other and unspecified sites | 23 |  | - | **-** | **-** |
| 1), 2), 3), 4) and 5) combined | 90 |  | 0.41(0.24 to 0.70)* | 0.37(0.10 to 1.11) | 0.29(0.14 to 0.60)* |
| 6). Digestive organs and peritoneum | 91 |  | 0.54(0.32 to 0.89)* | 0.10(0.01 to 0.77)* | 0.15(0.05 to 0.39)* |
| 7). Bone, connective tissue, skin, and breast | 30 |  | 0.24(0.08 to 0.72)* | 0.45(0.10 to 2.04) | 0.17(0.04 to 0.78)* |

†, Classification was based on the International Classification of Disease code, 9th revision (there are overlaps among site specific cancers).

‡, Adjusted for LDL-C related risk (i.e., <2.80 mmol/L plus albuminuria and ≥3.80 mmol/L), age, sex, BMI, smoking status, and alcohol drinking, HDL-C, triglyceride, duration of diabetes, HbA1c, systolic BP, eGFR and medications from enrolment to cancer, death or censoring date (oral anti-diabetic drugs, insulin and fibrates) whichever came first, and use of other antihypertensive drugs at enrolment. To avoid over-fitting, the propensity score for the site specific cancer was used in all adjustments. In addition, restricted spline functions of all continuous covariates were used to calculate the propensity score to improve adjustment for non-linear associations.

*, Indicate statistical significance.
